# Supplementary material
Source: PubMed Central journal article supplement (PMC8433555)
Supplement: pnas.2105951118.sapp.pdf [file pnas.2105951118.sapp.pdf]

## Supplementary Information

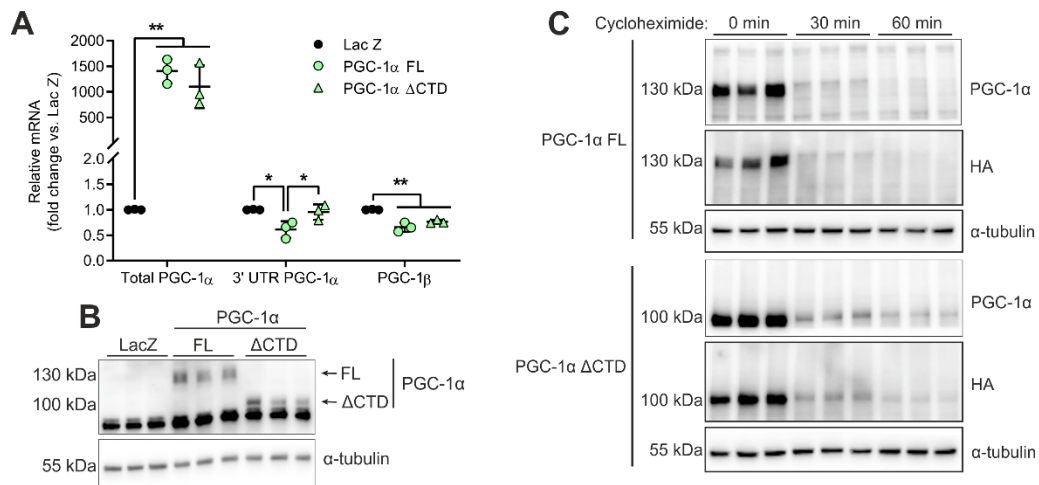

**Fig. S1. Overexpression of PGC-1 $\alpha$  FL and  $\Delta$ CTD in C2C12 myotubes.** (A, B) PGC-1 $\alpha$  mRNA (A) and protein (B) levels in C2C12 myotubes transduced with LacZ (control), PGC-1 $\alpha$  FL or  $\Delta$ CTD (n = 3 independent experiments each in triplicate). (C) PGC-1 $\alpha$  protein half-life analysis in C2C12 myotubes transduced with PGC-1 $\alpha$  FL or  $\Delta$ CTD and treated with DMSO as control or 100  $\mu$ g/ml cycloheximide. Values are mean  $\pm$  SD; \*p < 0.05 and \*\*p < 0.01. Immunoblots are representative of three independent experiments, each performed in triplicate.

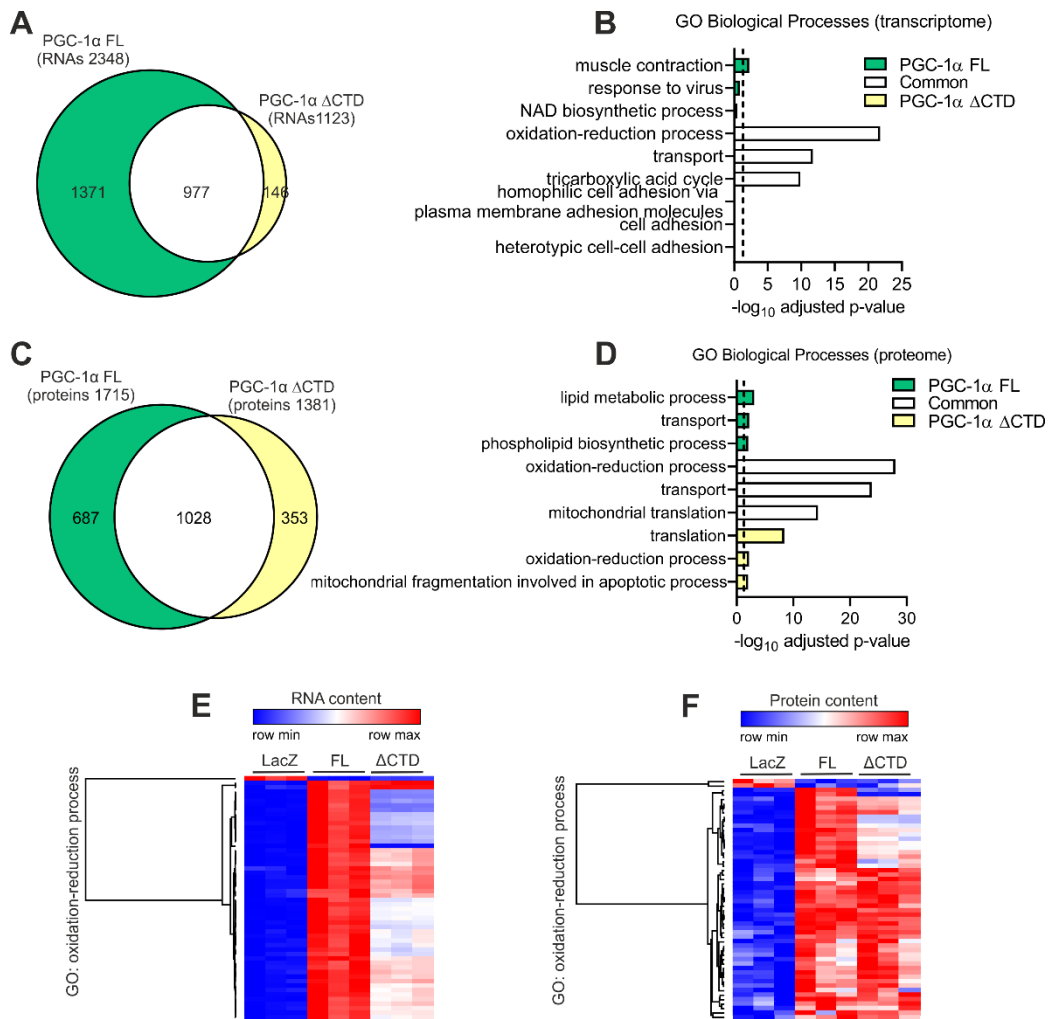

**Fig. S2. Transcriptome and proteome analysis.** (A, B) Overlap (A) and gene ontology (GO) analysis (B) of DEG induced by PGC-1 $\alpha$  FL or  $\Delta$ CTD in C2C12 myotubes. (C, D) Overlap (C) and GO analysis (D) of proteins regulated by PGC-1 $\alpha$  FL or  $\Delta$ CTD in C2C12 myotubes. (E, F) Heat maps showing the content of RNAs (E) and proteins (F) contained in the GO term oxidation-reduction process in C2C12 myotubes overexpressing LacZ (control), PGC-1 $\alpha$  FL or  $\Delta$ CTD. Dashed line represents GO statistical cutoff (adjusted p-value < 0.05).

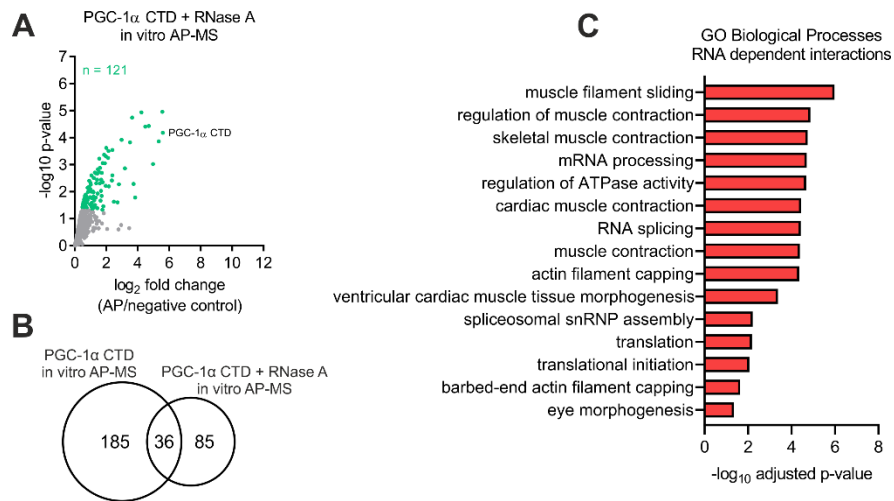

**Fig. S3. RNA dependent protein-protein interaction analysis.** (A) Volcano plot with green dots representing proteins interacting with the CTD of PGC-1 $\alpha$  in the presence of 1 mg/ml of RNase A. (B) Overlap of PGC-1 $\alpha$  CTD interacting proteins in the absence and presence of 1 mg/ml of RNase A. (C) Gene ontology (GO) analysis of RNA dependent PGC-1 $\alpha$  CTD interacting proteins.

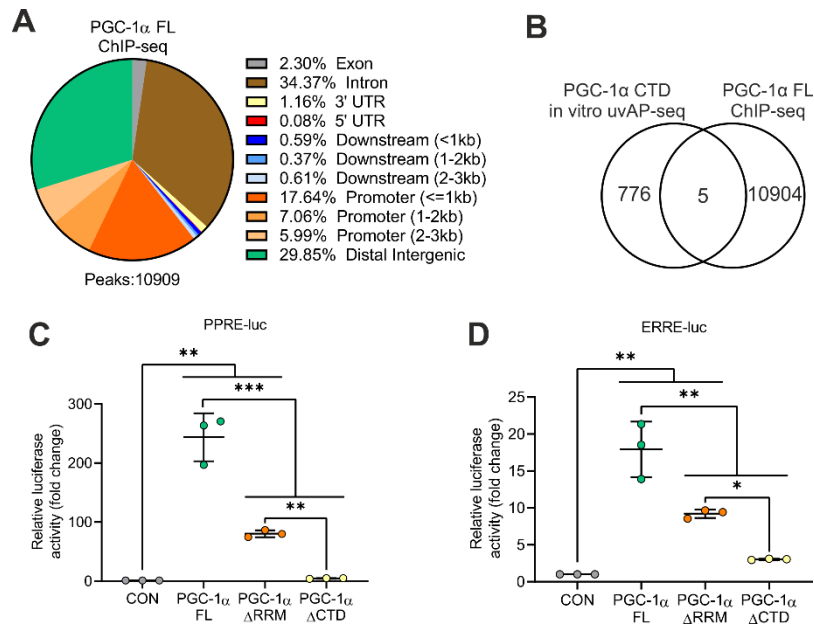

**Fig. S4. ChIP-seq analysis of PGC-1 $\alpha$  FL and reporter gene assay.** (A) Annotation of PGC-1 $\alpha$  FL ChIP-seq peaks. (B) Overlap of PGC-1 $\alpha$  CTD and FL in vitro AP-seq and ChIP-seq peaks, respectively. (C and D) Relative luciferase activity of PPRE-luc (C) and ERRE-luc (D) reporter plasmids in HEK293 cells co-transfected with PPAR $\beta/\delta$  (PPRE-luc) or ERR $\alpha$  (ERRE-luc) in the absence (CON: control) and presence of PGC-1 $\alpha$  FL,  $\Delta$ RRM or  $\Delta$ CTD (n = 3 independent experiments, each performed in triplicate). Values are mean  $\pm$  SD; \*p < 0.05, \*\*p < 0.01 and \*\*\*p < 0.001.

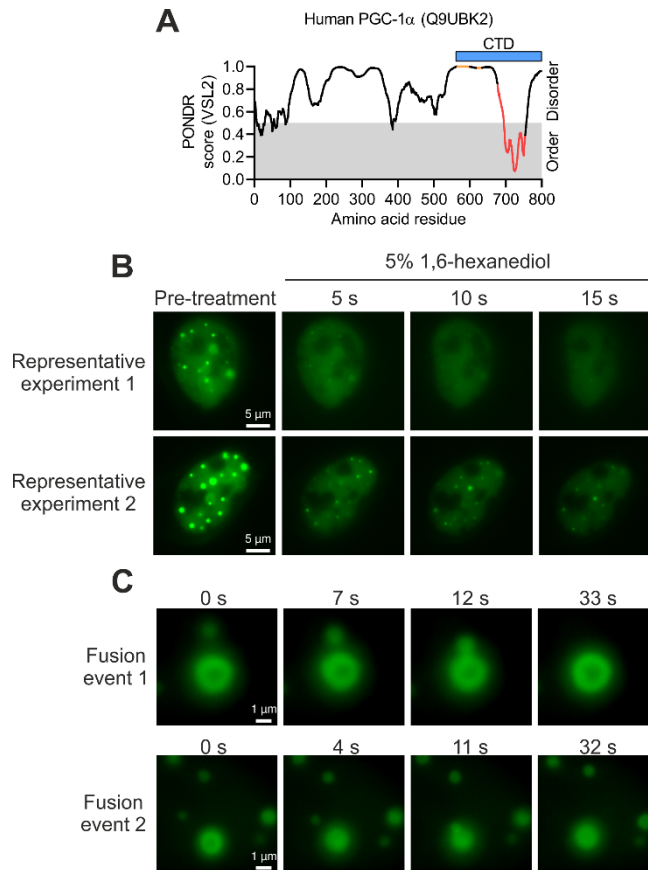

**Fig. S5. Analysis of liquid-like properties of PGC-1 $\alpha$  nuclear foci.** (A) Predictor of Natural Disordered Regions (PONDR) analysis of human PGC-1 $\alpha$  protein, with orange and red dots representing RS domains and RRM, respectively. (B) Additional live imaging of 5% 1,6-hexanediol treatment of C2C12 myoblasts transfected with GFP-PGC-1 $\alpha$  FL. (C) Additional live imaging of GFP-PGC-1 $\alpha$  FL droplet fusion events in C2C12 myoblasts. Microscopy images are representative of at least three independent experiments, each performed in triplicate.

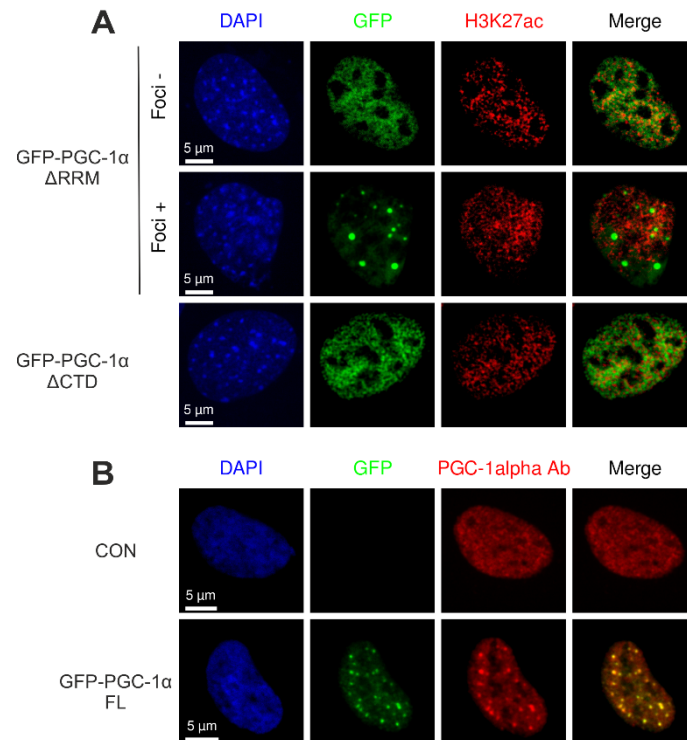

**Fig. S6. PGC-1 $\alpha$  nuclear condensates and immunofluorescence staining.** (A) Images of transfected GFP-PGC-1 $\alpha$   $\Delta$ RRM or  $\Delta$ CTD co-stained with DAPI and H3K27ac in C2C12 myoblasts. (B) Images of HEK293 cells transfected with a control (CON) empty plasmids or GFP-PGC-1 $\alpha$  FL co-stained with DAPI and PGC-1 $\alpha$  antibody (Ab). Microscopy images are representative of at least three independent experiments, each performed in triplicate.

**Movie S1. Fusion of PGC-1 $\alpha$  nuclear condensates.** Representative movie of GFP-PGC-1 $\alpha$  FL droplet fusion in C2C12 myoblasts.
